# Supplementary material for: Comparing efficacies of moxifloxacin, levofloxacin and gatifloxacin in tuberculosis granulomas using a multi-scale systems pharmacology approach
Source: PubMed Central journal article supplement (PMC5560534; doi:10.1371/journal.pcbi.1005650), 2017-08-17
Supplement: pcbi.1005650.s001.pdf [file pcbi.1005650.s001.pdf]

## Pharmacodynamic parameter estimation

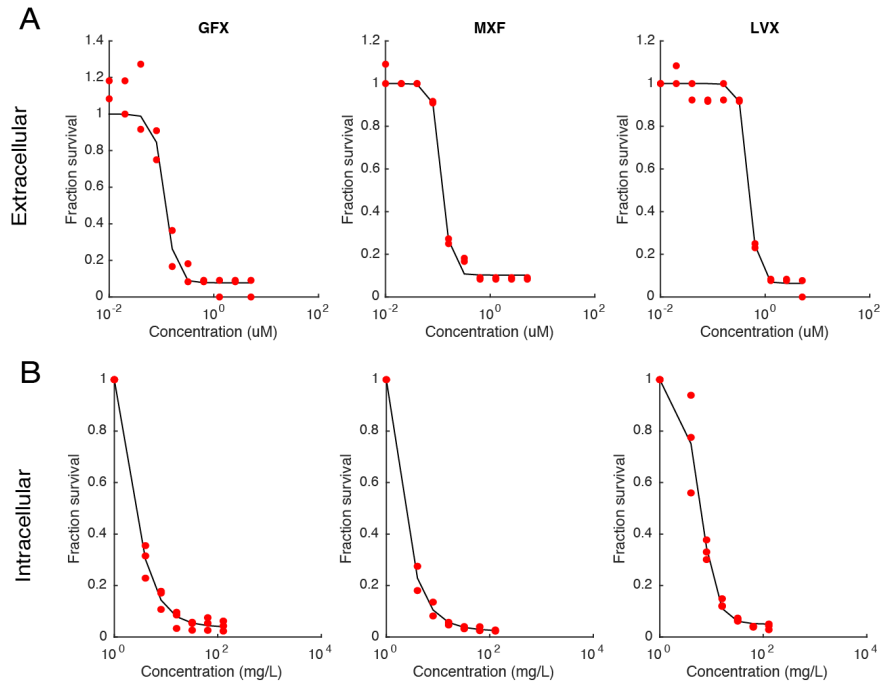

Figure S1: Overlay of *in vitro* and fitted *in silico* dose response curves for *Mtb* in liquid culture after 5 days (A) and in mouse macrophages after 3 days (B). Red data points show *in vitro* data, and black lines show model fit. X-axis shows antibiotic concentration added in the culture medium.
