# Supplementary material for: Comparing efficacies of moxifloxacin, levofloxacin and gatifloxacin in tuberculosis granulomas using a multi-scale systems pharmacology approach
Source: PubMed Central journal article supplement (PMC5560534; doi:10.1371/journal.pcbi.1005650), 2017-08-17
Supplement: pcbi.1005650.s006.pdf [file pcbi.1005650.s006.pdf]

## Host immune parameters varied to capture granuloma variability for tissue PK calibration

Table S1: Host immune parameter ranges used to generate collections of test granulomas to calibrate tissue PK parameters<sup>1,2</sup>

| Host Immune Parameters                                                                                      | Unit*                  | Range (min – max)                                  |
|-------------------------------------------------------------------------------------------------------------|------------------------|----------------------------------------------------|
| Time to heal caseation                                                                                      | Days                   | 8 – 12                                             |
| TNF threshold for causing apoptosis                                                                         | Molecules              | 900 – 1400                                         |
| Rate of TNF induced apoptosis                                                                               | s <sup>-1</sup>        | 1.3x10 <sup>-6</sup> – 2x10 <sup>-6</sup>          |
| Minimum chemokine concentration allowing chemotaxis                                                         | Molecules              | 0.4 – 0.6                                          |
| Maximum chemokine concentration allowing chemotaxis                                                         | Molecules              | 380 – 570                                          |
| Initial macrophage density                                                                                  | Fraction of grid comp. | 0.03 – 0.05                                        |
| Time steps before a resting macrophage can move                                                             | Timesteps              | 2 – 4                                              |
| Time steps before an activated macrophage can move                                                          | Timesteps              | 15 – 24                                            |
| Time steps before an infected macrophage can move                                                           | Timesteps              | 135 – 200                                          |
| TNF threshold for activating NFkB                                                                           | Molecules              | 60 – 90                                            |
| Rate of TNF induced NFkB activation                                                                         | s <sup>-1</sup>        | 8x10 <sup>-6</sup> – 1.5x10 <sup>-5</sup>          |
| Probability of resting macrophage killing bacteria                                                          |                        | 0.1 – 0.15                                         |
| Adjustment for killing probability of resting macrophages with NFkB activated                               |                        | 0.15 – 0.25                                        |
| Number of extracellular bacteria in the Moore neighborhood that can activate NFkB                           | Bacteria               | 200 – 300                                          |
| Threshold for intracellular bacteria causing chronically infected macrophages                               | Bacteria               | 10 – 15                                            |
| Threshold for intracellular bacteria causing macrophage to burst                                            | Bacteria               | 18 – 30                                            |
| Number of bacteria activated macrophage can phagocytose                                                     | Bacteria               | 4 – 6                                              |
| Probability of an activated macrophage healing a caseated compartment in its Moore neighborhood             |                        | 0.004 – 0.007                                      |
| Number of host cell deaths causing caseation                                                                |                        | 4 (Caseous granulomas)<br>15 (Cellular granulomas) |
| Probability of a T-cell moving to the same compartment as a macrophage                                      |                        | 0.035 – 0.055                                      |
| IFN $\gamma$ –producing T-cell probability of inducing Fas/FasL mediated apoptosis                          |                        | 0.03 – 0.04                                        |
| IFN $\gamma$ –producing T-cell probability of producing TNF                                                 |                        | 0.04 – 0.05                                        |
| IFN $\gamma$ –producing T-cell probability of producing IFN                                                 |                        | 0.3 – 0.45                                         |
| Cytotoxic T-cell probability of killing a macrophage                                                        |                        | 0.007 – 0.01                                       |
| Cytotoxic T-cell probability of, when it kills a macrophage, also killing all of its intracellular bacteria |                        | 0.6 – 0.9                                          |
| Cytotoxic T-cell probability of producing TNF                                                               |                        | 0.04 – 0.06                                        |
| Regulatory T-cell probability of deactivating activated macrophage                                          |                        | 0.006 – 0.01                                       |
| Time before maximum recruitment rates are reached                                                           | Timesteps*             | 790 – 1180                                         |
| Macrophage maximal recruitment probability                                                                  |                        | 0.25 – 0.4                                         |
| Macrophage chemokine recruitment threshold                                                                  | Molecules              | 0.7 – 1                                            |
| Macrophage TNF recruitment threshold                                                                        | Molecules              | 0.009 – 0.015                                      |
| Macrophage half sat for TNF recruitment                                                                     | Molecules              | 1.3 – 2                                            |
| Macrophage half sat for chemokine recruitment                                                               | Molecules              | 1.8 – 2.6                                          |
| IFN $\gamma$ –producing T-cell maximal recruitment probability                                              |                        | 0.12 – 0.18                                        |
| IFN $\gamma$ –producing T-cell chemokine recruitment threshold                                              | Molecules              | 0.0.06 – 0.09                                      |
| IFN $\gamma$ –producing T-cell TNF recruitment threshold                                                    | Molecules              | 1 – 1.6                                            |
| IFN $\gamma$ –producing T-cell half sat for TNF recruitment                                                 | Molecules              | 1 – 1.6                                            |

|                                                                   |           |             |
|-------------------------------------------------------------------|-----------|-------------|
| IFN $\gamma$ –producing T-cell half sat for chemokine recruitment | Molecules | 1.5 – 2.5   |
| Cytotoxic T-cell maximal recruitment probability                  |           | 0.1 – 0.15  |
| Cytotoxic T-cell chemokine recruitment threshold                  | Molecules | 3.6 – 5.4   |
| Cytotoxic T-cell TNF recruitment threshold                        | Molecules | 1 – 1.5     |
| Cytotoxic T-cell half sat for TNF recruitment                     | Molecules | 1 – 1.5     |
| Cytotoxic T-cell half sat for chemokine recruitment               | Molecules | 7 – 10      |
| Regulatory T-cell maximal recruitment probability                 |           | 0.02 – 0.04 |
| Regulatory T-cell chemokine recruitment threshold                 | Molecules | 1.5 – 2.5   |
| Regulatory T-cell TNF recruitment threshold                       | Molecules | 1.3 – 2     |
| Regulatory T-cell half sat for TNF recruitment                    | Molecules | 1.8 – 2.7   |
| Regulatory T-cell half sat for chemokine recruitment              | Molecules | 1.2 – 1.8   |

\*Conversion factor: 10 min/timestep.

## References

- 1 Pienaar, E. *et al.* A computational tool integrating host immunity with antibiotic dynamics to study tuberculosis treatment. *J Theor Biol* **367**, 166-179, doi:10.1016/j.jtbi.2014.11.021 (2015).
- 2 Pienaar, E., Dartois, V., Linderman, J. J. & Kirschner, D. In silico evaluation and exploration of antibiotic tuberculosis treatment regimens. *BMC systems biology* **9**, 79, doi:10.1186/s12918-015-0221-8 (2015).
